# Supplementary material for: The differential response to neuronal hyperexcitation and neuroinflammation of the hippocampal neurogenic niche
Source: PubMed Central journal article supplement (PMC10366379; doi:10.3389/fnins.2023.1186256), 2023-07-11
Supplement: Data_Sheet_1.pdf [file Data_Sheet_1.pdf]

## Supplementary Figures

**Supplementary Figure 1. Statistical results for 3D-Sholl analysis.** Level of significance corresponding to the comparison among all groups for each point of analysis (radius)\*  $p < 0.05$ , \*\* $p < 0.01$ , \*\*\* $p < 0.001$ .

**Supplementary Figure 2. TBI induces C-Fos expression. (A)** Confocal microscopy images showing immunostaining for C-Fos and counterstaining for DAPI in the dentate gyrus. **(B)** Quantification of the density of C-Fos positive cells in the GCL in NI models, TBI and corresponding controls 3 days after the application of the stimulus. Scale bar is 50  $\mu\text{m}$ . \*  $p < 0.05$ , \*\* $p < 0.01$ , \*\*\* $p < 0.001$  one-way ANOVA after all pairwise multiple comparisons by Holm-Sidak post hoc test. Bars show mean  $\pm$  SEM. Dots show individual data.

**Supplementary Figure 3. NI models trigger microgliosis. (A)** Confocal microscopy images of the dentate gyrus after immunostaining for the microglia marker Iba-1 and BrdU. DAPI was used for counterstaining. Changes in microglia morphology can be observed in all models. **(B)** Quantification of the proportion of microglia immunopositive for BrdU. See Supplementary Figure 4A for statistical results. **(C)** Quantification of the proportion of change of CD68 mRNA. See Supplementary Figure 4B for statistical results. **(D)** Quantification of the proportion of change of IL-1 $\beta$  mRNA. See Supplementary Figure 4C for statistical results. **(E)** Quantification of the proportion of change of TNF- $\alpha$  mRNA **(F)** Proportion of dividing NSCs among the total population of NSCs (NI vs control). See Supplementary Figure 4A for statistical results. See Supplementary Figure 4D for statistical results.

**Supplementary Figure 4. Statistical results for microglial proliferation (A) and mRNA for CD68 (B), IL-1 $\beta$  (C) and TNF- $\alpha$  (D).** Level of significance corresponding to the comparison among all groups for each point of analysis (radius)\*  $p < 0.05$ , \*\* $p < 0.01$ , \*\*\* $p < 0.001$ , after one-way ANOVA after all pairwise multiple comparisons by Holm-Sidak post hoc test.
